# Supplementary material
Source: publisher figshare collection journal article supplement (https://acs.figshare.com/ndownloader/files/28177716)
Supplement: Supplementary file 1 [file 28177716]

# Supporting Information

## Origins of the Instability of Non-precious HER Catalysts at Open Circuit Potential

Zhenbin Wang,<sup>1,†</sup> Ya-Rong Zheng,<sup>1,3,†</sup> Joseph Montoya,<sup>2</sup> Degenhart Hochfilzer,<sup>1</sup> Ang Cao,<sup>1</sup>

Jakob Kibsgaard,<sup>1</sup> Ib Chorkendorff,<sup>1</sup> and Jens K. Nørskov,<sup>1,\*</sup>

<sup>1</sup>Department of Physics, Technical University of Denmark, 2800 Kongens Lyngby, Denmark

<sup>2</sup>Toyota Research Institute, Los Altos, CA 94022, USA

<sup>3</sup>Anhui Province Key Laboratory of Advanced Catalytic Materials and Reaction Engineering,  
School of Chemistry and Chemical Engineering, Hefei University of Technology, 230009, Hefei,  
China.

<sup>†</sup>These authors contributed equally

E-mail: [jkno@dtu.dk](mailto:jkno@dtu.dk)

# Computational Methods

## Density functional theory

All density functional theory (DFT) calculations were performed using Vienna *ab initio* simulation package within the projector-augmented wave method.<sup>1,2</sup> The strongly constrained and appropriately normed (SCAN) functional<sup>3</sup> was used for the exchange-correlation description. The plane wave energy cutoff was set to 520 eV. The electronic energy and atomic forces were converged to within  $10^{-5}$  eV and 0.02 eV/Å. The Brillouin zone was sampled with a  $k$ -point density of at least 1000 per reciprocal atom.<sup>4</sup> All calculations were spin-polarized. The crystal structure manipulations and data analysis were carried out using the Pymatgen software package.<sup>5</sup>

## Pourbaix diagram

Methodologies of Pourbaix diagram construction based on DFT calculations have been detailed in prior works.<sup>6-9</sup> The basic principles are summarized as below. In the Pourbaix diagram construction, the stable domains are determined based on the knowledge of all possible equilibrium redox reactions in the chemical space of interest.

In an aqueous solution under certain pH ( $-\log[\text{H}^+]$ ) and potential ( $E$ ), the following redox reaction takes place:

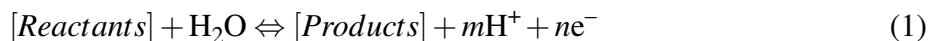

At equilibrium, the Gibbs free energy change ( $\Delta G_{\text{rxn}}$ ) of this reaction can be related to  $E$  using the Nernst equation:

$$-nFE = \Delta G_{\text{rxn}} = \Delta G_{\text{rxn}}^0 + 2.303 \times RT \times \log \frac{a_{\text{Reactants}}}{a_{\text{Products}}} - 2.303 \times RT \times m \times \text{pH} \quad (2)$$

where  $\Delta G_{\text{rxn}}^0$  is the Gibbs free energy change of the reaction at standard conditions,  $F$  is the Faraday constant,  $R$  is the gas constant, and  $T$  is the temperature.  $a$  is the activity. The most stable species in aqueous solutions can be therefore determined by minimizing ( $\Delta G_{\text{rxn}} + nFE$ ) across all possible

reactions under certain pH and applied potential ( $E$ ). The aqueous stability of a catalyst could be quantitatively estimated by its chemical potential difference ( $\Delta G_{\text{pbx}}$ ) with respect to the stable domains on the Pourbaix diagram under working conditions. Note that the zero-point energy and integrated heat capacity for both solids and gases are neglected by assuming the differences in these quantities between reactants and products are negligible at room temperature.<sup>9</sup> The chemical potentials of solids and aqueous ions are provided in Table S3. The raw data (structures and energies) are shared via **figshare**.

## Experimental Methods

### Exfoliation of commercial MoS<sub>2</sub>

Typically, 500 mg commercial MoS<sub>2</sub> (Fluka, CAS no.: 1317-33-5) was mixed with 40 mL N,N-Dimethylformamide (DMF, CAS no. 68-12-2) and sonicated continuously for 8 hours. The resultant solution was centrifuged at 2,000 rpm for 10 min, and the supernatant was further centrifuged at 15,000 rpm for 20 min to obtain the exfoliated MoS<sub>2</sub>. The resultant sample was washed several times by ethanol.

### Preparation of CoP

The CoP was prepared by a two-step method. First, Co-O-H precursor was prepared by mixing 1 M Co<sup>2+</sup> and 2 M OH<sup>-</sup> solution with mechanical stirring under ambient conditions. The precipitate was centrifuged at 6,000 rpm for 5 min, and was washed several times by ethanol and Milli-Q (18 M $\omega$  cm<sup>-1</sup>) water, the precursor was dried under at 100 °C for 6 h. After that, 100 mg dried Co-O-H precursor and 2 g NaH<sub>2</sub>PO<sub>2</sub>·H<sub>2</sub>O (Aldrich, CAS no.: 7681-53-0) were placed at two separated positions in a ceramic boat with the NaH<sub>2</sub>PO<sub>2</sub>·H<sub>2</sub>O at the upstream side. With a heating rate of 10 °C min<sup>-1</sup>, the samples were heated at 400 °C for 30 min in Ar atmosphere.

## Preparation of MoP

Typically, 2.7821 g of  $(\text{NH}_4)_6\text{Mo}_7\text{O}_{24}\cdot 4\text{H}_2\text{O}$  (Fluka, CAS no.: 12054-85-2) and 2.0797 g of  $(\text{NH}_4)_2\text{HPO}_4$  (Aldrich, CAS no.: 7783-28-0) were dissolved in 6 mL of  $\text{H}_2\text{O}$ , the solution was evaporated at 90 °C for 2 h under 200 rpm and then dried at 120 °C for 2 days. Finally, the Mo-P precursor was heated to 665 °C with a heating rate of 1 °C min<sup>-1</sup>, and held for 2 h under  $\text{H}_2$  stream with a flow rate of 116 mL min<sup>-1</sup> to get the final MoP.

## Characterization (XRD, XPS, ICP-MS)

Phase structure of the prepared material was determined by X-ray diffraction (XRD) using a PANalytical Empyrean diffractometer with Cu K $\alpha$  radiation ( $\lambda = 1.54178 \text{ \AA}$ ). The concentration of dissolved metal ions were detected using inductively coupled plasma-mass spectrometry (ICP-MS, Fischer Scientific, model iCAP-QC ICP-M).

## Electrochemical measurements

All the electrochemical measurements were conducted in a three electrodes setup with a H-cell configuration at ambient temperature, as previously described in Ref 10. A Hg/HgSO<sub>4</sub> electrode and a graphite rod were used as the reference and counter electrodes, respectively. A rotating disk electrode with glassy carbon (PINE, 0.196 cm<sup>2</sup>) was used as the working electrode. All the electrodes were connected to a Multipotentiostat (VMP2, Biologic). The potentials reported here were normalized versus the reverse hydrogen electrode by measuring the open circuit potential (OCP) at a Pt electrode in  $\text{H}_2$ -saturated electrolyte. To make the catalyst ink, 4 mg catalyst powder was dispersed in 1 mL of 1:3 v/v isopropanol/DIW mixture with 40  $\mu\text{L}$  Nafion solution (5 wt%), which was ultrasonicated to obtain a homogeneous ink. Then, 20  $\mu\text{L}$  catalyst ink was pipetted onto the glassy carbon electrode with a loading of  $\sim 0.4 \text{ mg cm}^{-2}$ . The polarization curves were obtained by sweeping the potentials from -0.7 to 0 versus RHE with a scan rate of 20 mVs<sup>-1</sup> and 1600 rpm in  $\text{H}_2$ -saturated 0.5 M  $\text{H}_2\text{SO}_4$  solution at ambient temperature. The corrosion measurements were

performed by chronoamperometry at different potentials. ICP-MS was employed to analyze the dissolved metal ions during chronopotentiometry. Each ICP-MS data point was collected at least three times.

# MP-PBE Mo-S Pourbaix diagram

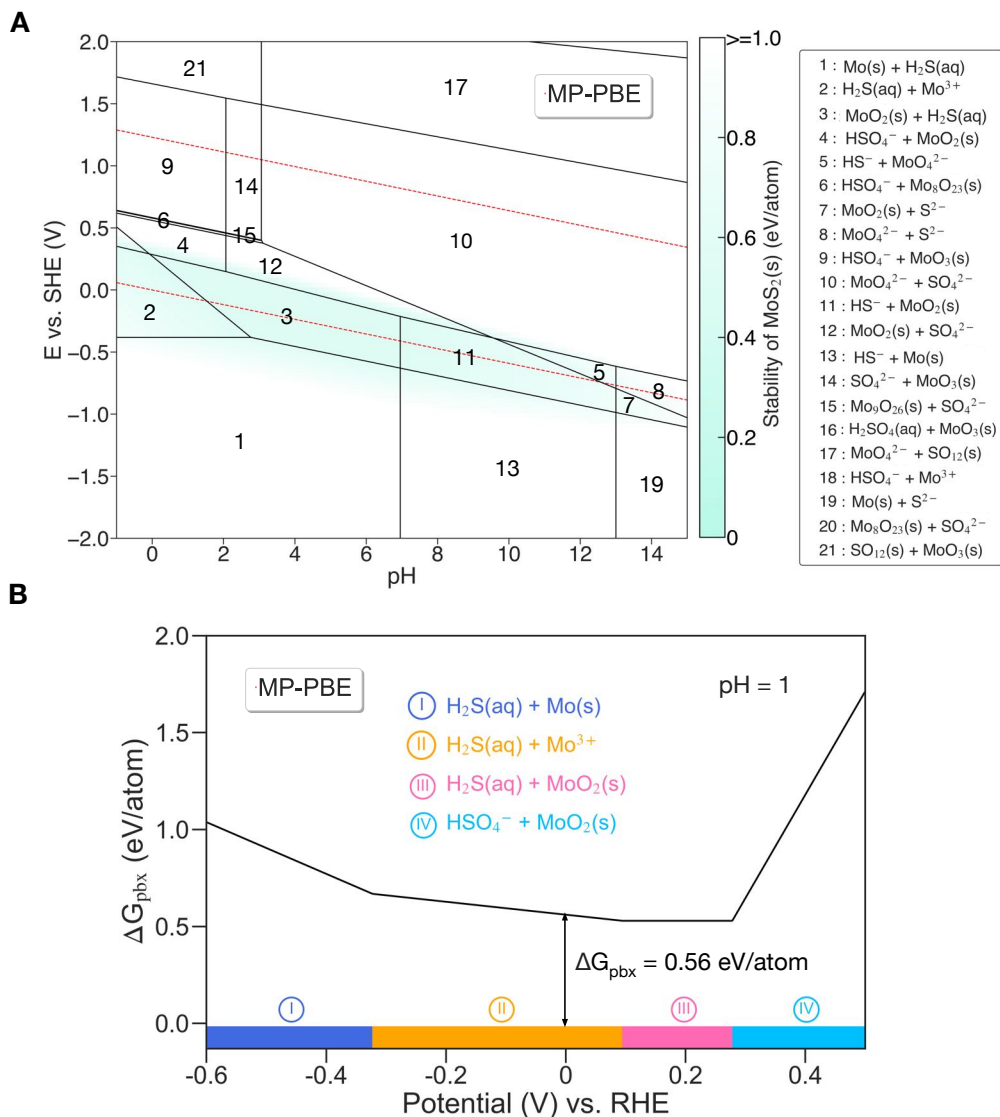

Figure S1: (A) The Materials Project PBE (MP-PBE) calculated Mo-S Pourbaix diagram generated with aqueous ion concentration of  $10^{-6}$  M at  $25^\circ\text{C}$ . The Lake blue color measures the stability of  $\text{MoS}_2$  at relevant potential and pH. The water stability window is shown in red dashed line. (B) Calculated decomposition free energy ( $\Delta G_{\text{pbx}}$ ) of  $\text{MoS}_2$  from the potential  $-0.6$ – $0.5$  V vs. RHE at pH = 1. The projection of  $\Delta G_{\text{pbx}}$  onto the potential axis highlights the stable species at the corresponding regions.

$\text{MoS}_2$  does not appear in the MP-PBE calculated Mo-S Pourbaix diagram (Figure S1A), suggesting that it might be unstable or metastable. Based on Figure S1A, we quantitatively analyzed the stability of  $\text{MoS}_2$  by calculating its  $\Delta G_{\text{pbx}}$  from potential of  $-0.6$  V to  $0.5$  V at pH = 1, shown in

Figure S1B. The MP-PBE calculated  $\Delta G_{\text{pbx}}$  of  $\text{MoS}_2$  is higher than 0.57 eV/atom when the potential is lower than 0 V, implying that  $\text{MoS}_2$  would experience a very large thermodynamic driving force to decompose during electrocatalysis. This predicted instability of  $\text{MoS}_2$  under typical hydrogen evolution potentials is inconsistent with experiment.<sup>11–14</sup>

# Mo-P Pourbaix diagram

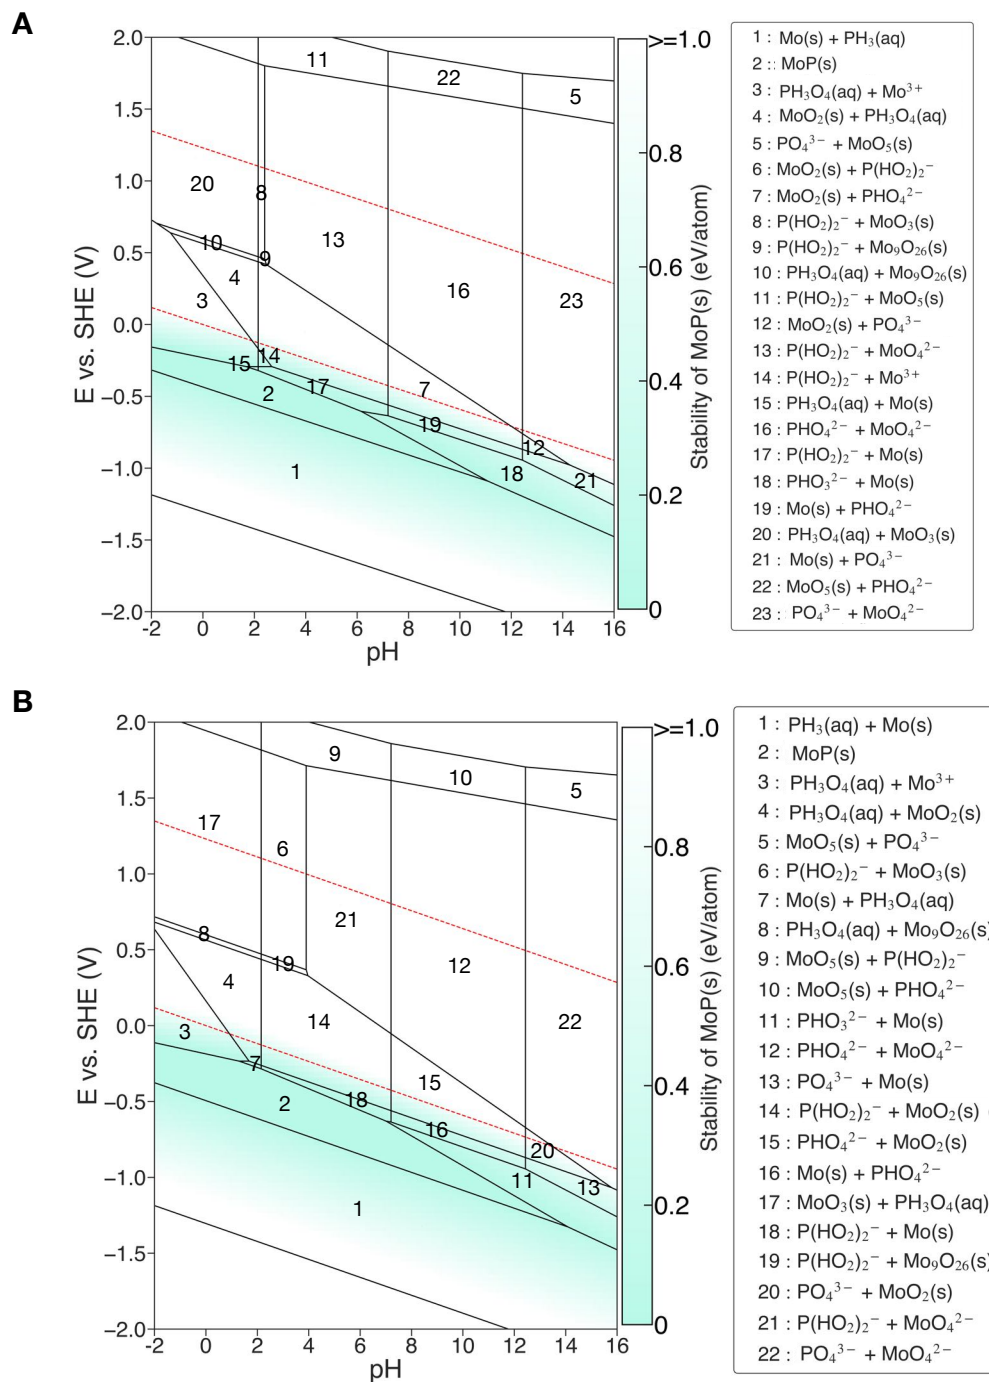

Figure S2: SCAN-calculated Mo-P Pourbaix diagrams generated with aqueous ion concentration of (A)  $10^{-6}$  M and (B)  $10^{-3}$  at  $25^\circ\text{C}$ . The blue color measures the stability of MoP at relevant potential and pH. The deeper the blue, the more stable of MoP. The water stability window is shown in red dashed line.



# Co-P Pourbaix diagram

**A**

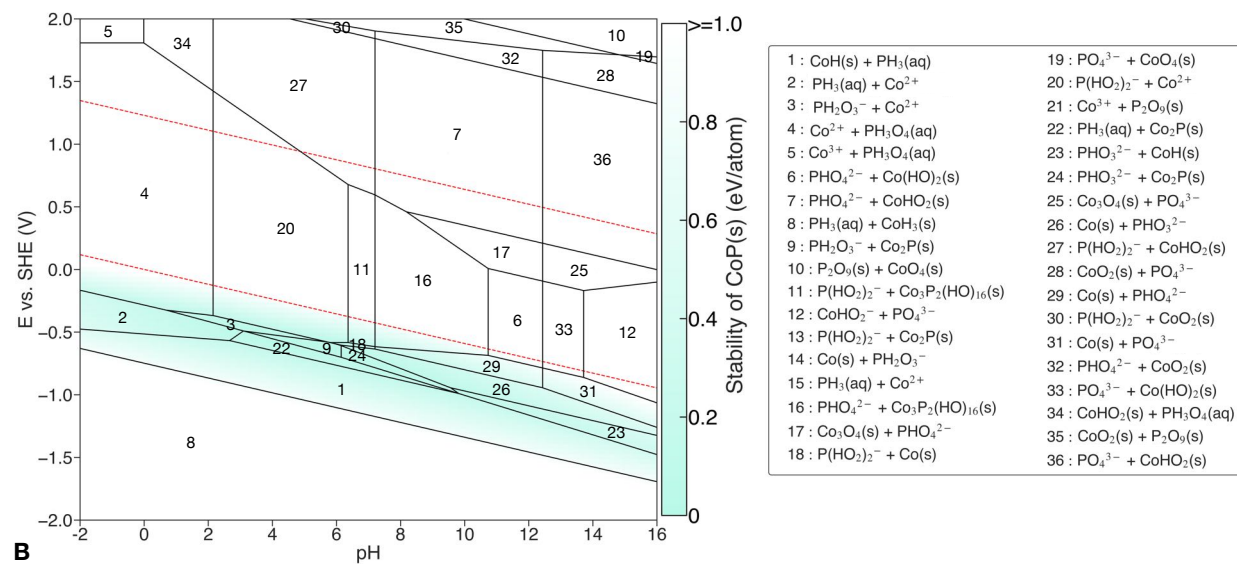

**B**

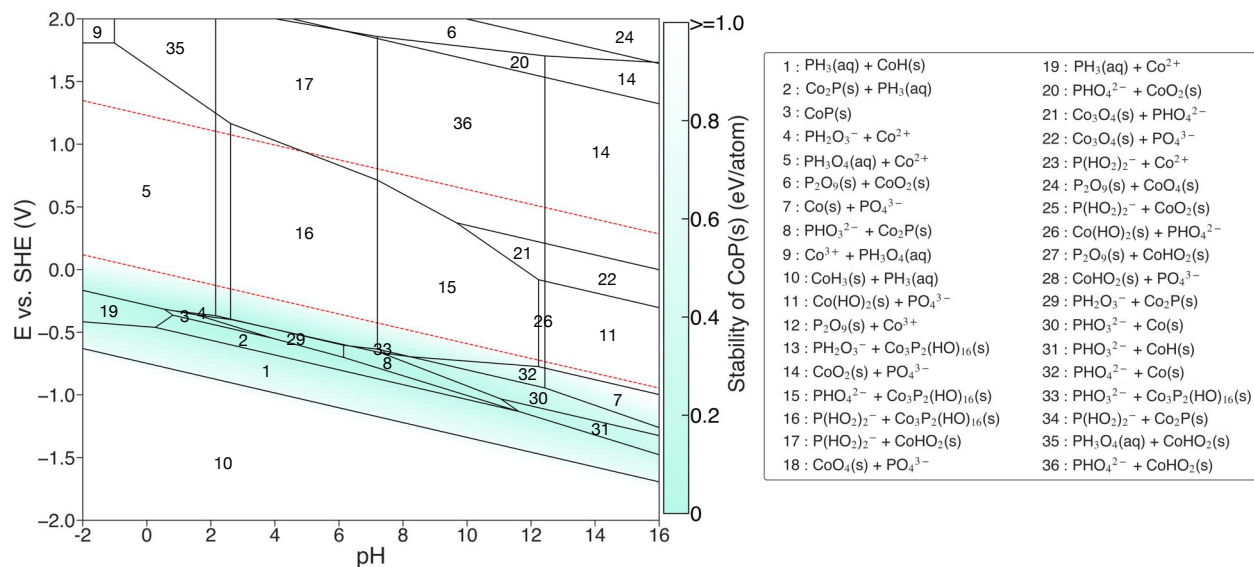

Figure S3: SCAN-calculated Co-P Pourbaix diagrams generated with aqueous ion concentration of (A)  $10^{-6}$  M and (B)  $10^{-3}$  at 25°C. The blue color measures the stability of CoP at relevant potential and pH. The water stability window is shown in red dashed line.

## Pt Pourbaix diagram

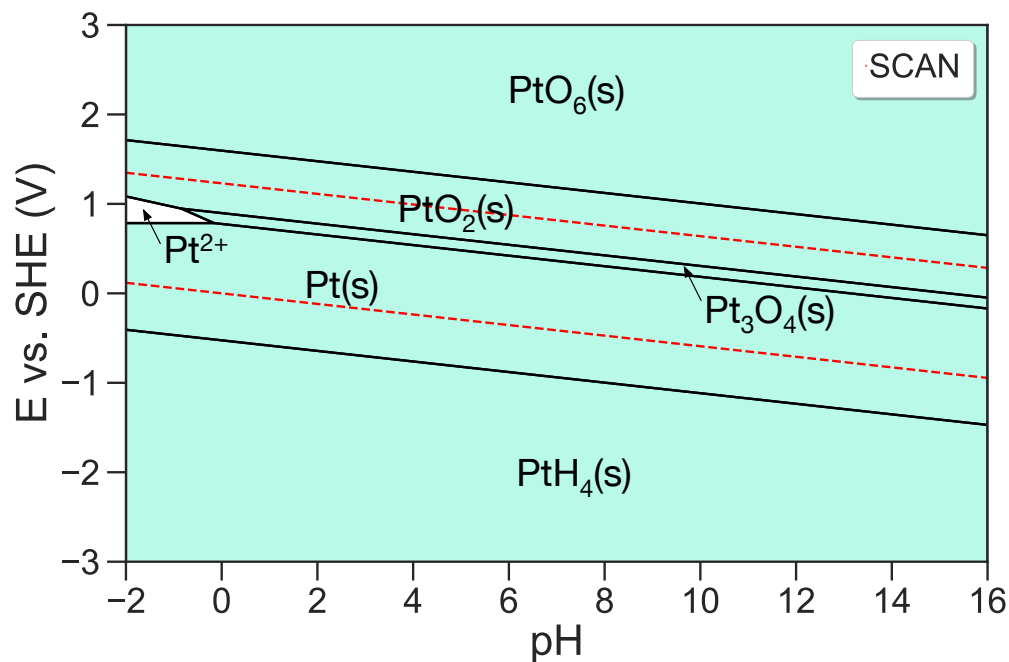

Figure S4: SCAN-calculated Pt Pourbaix diagrams generated with aqueous ion concentration of  $10^{-6}$  M at 25°C. Regions with solid are shaded in Lake blue. The water stability window is shown in red dashed line.

Compared to the experimental Pt Pourbaix diagram reported in Ref 15, we note that  $Pt(OH)_2$  does not appear on this calculated diagram. This is because  $Pt(OH)_2$  is not considered in the Pourbaix diagram calculation due to the missing data on its crystal structure in the literature.

## Formation enthalpies of phosphides

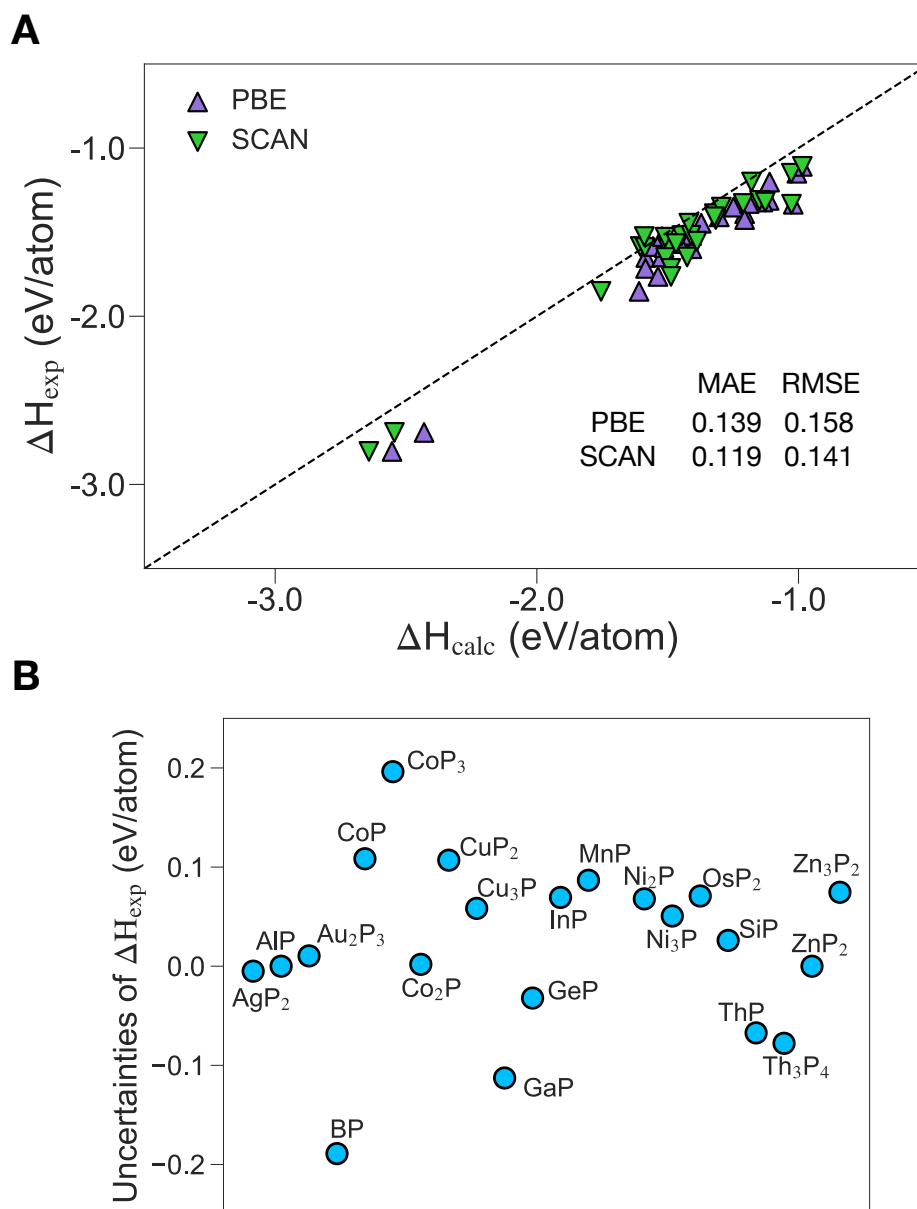

Figure S5: (A) Experimental formation enthalpies ( $\Delta H_{\text{exp}}$ ) of 28 binary phosphides as a function of calculated formation enthalpies ( $\Delta H_{\text{calc}}$ ).  $\Delta H_{\text{calc}}$  using the PBE functional were retrieved from the Materials Project.<sup>5,16</sup> and  $\Delta H_{\text{exp}}$  were obtained from Ref 17,18. Raw data are provided in Table S2. (B) Uncertainties of  $\Delta H_{\text{exp}}$  between experimental data from 17,18 and 19.

## Ni-Mo Pourbaix diagram

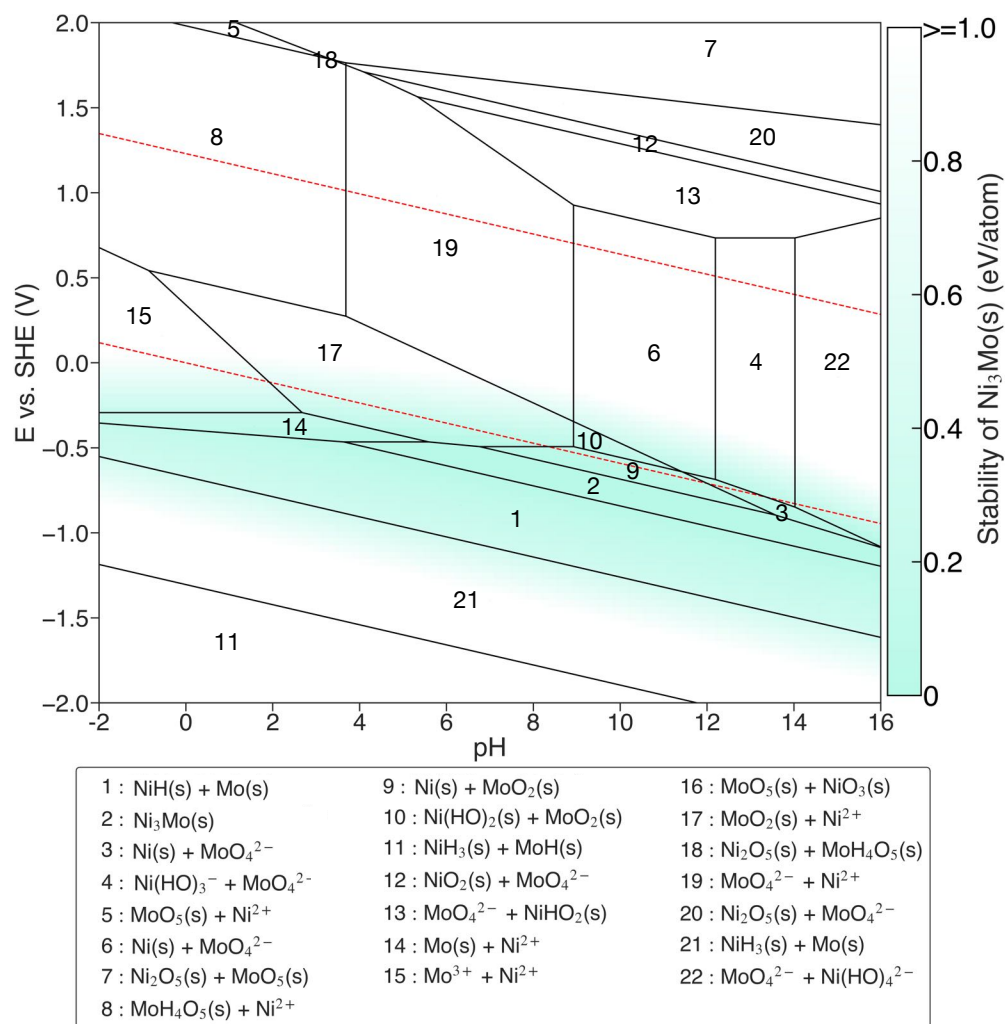

Figure S6: SCAN-calculated Ni-Mo Pourbaix diagrams generated with aqueous ion concentration of  $10^{-6}$  M at  $25^\circ\text{C}$ . The blue color measures the stability of  $\text{Ni}_3\text{Mo}$  at relevant potential and pH. The deeper the blue, the more stable of  $\text{Ni}_3\text{Mo}$ . The water stability window is shown in red dashed line.

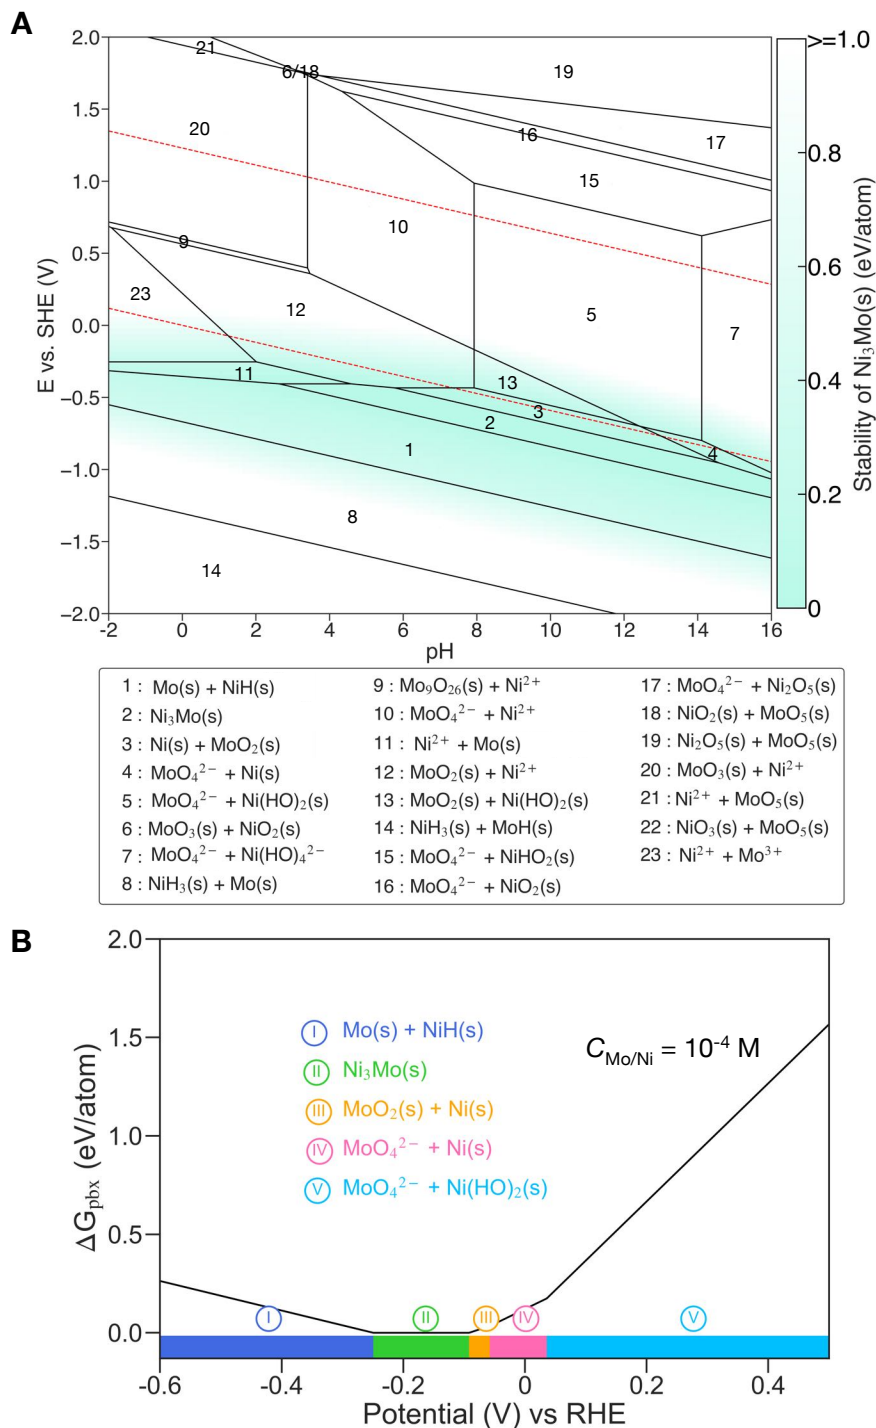

Figure S7: (A) Calculated Ni-Mo Pourbaix diagrams generated with aqueous ion concentration of  $10^{-4} \text{ M}$  at  $25^\circ\text{C}$ . The blue color measures the stability of  $\text{Ni}_3\text{Mo}$  at relevant potential and pH. The water stability window is shown in red dashed line. (B) Calculated Pourbaix decomposition free energy  $\Delta G_{\text{pbx}}$  of  $\text{Ni}_3\text{Mo}$  from the potential  $-0.6$ – $0.5 \text{ V}$  vs. RHE at  $\text{pH} = 14$ . The projection of  $\Delta G_{\text{pbx}}$  onto the potential axis highlights the stable species at the corresponding regions

## X-ray powder diffraction of MoP and CoP

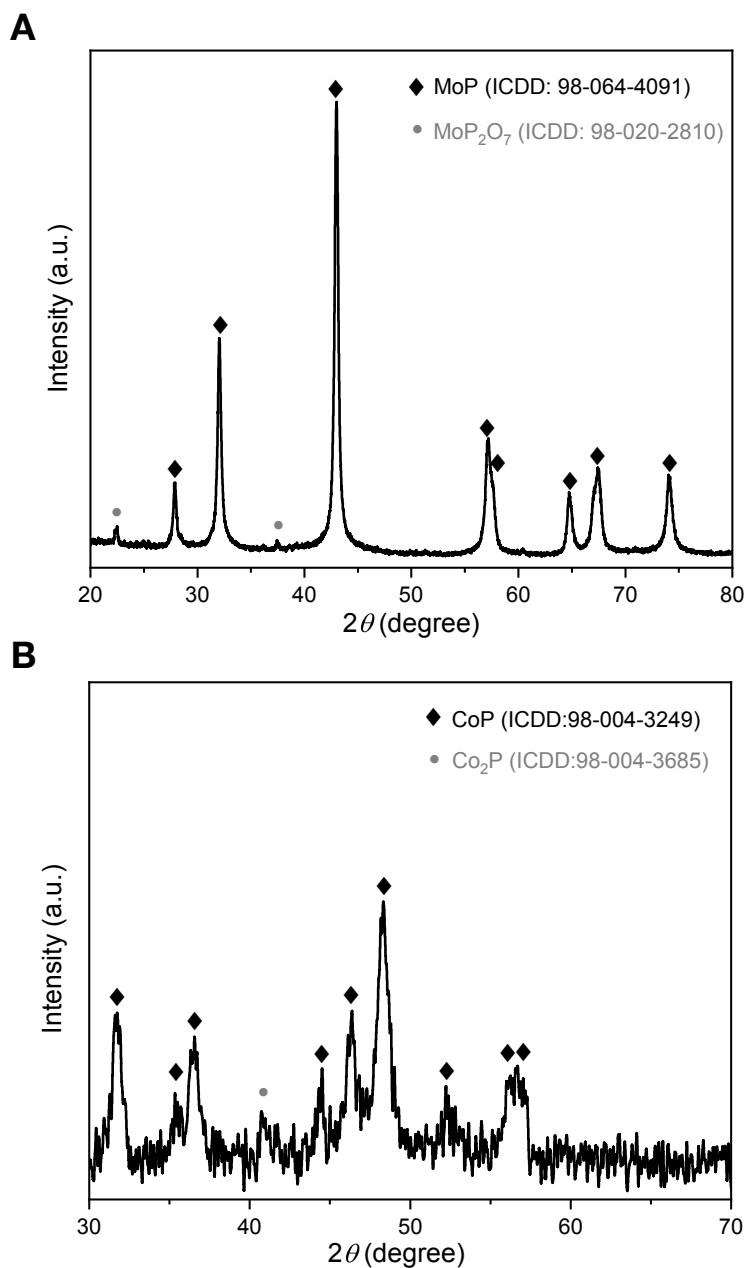

Figure S8: (A) X-ray diffraction pattern of the prepared MoP. The diffraction peaks can be assigned to hexagonal MoP (ICDD: 98-064-4091) (B) X-ray diffraction pattern of the prepared CoP. The diffraction peaks can be assigned to orthorhombic CoP (ICDD: 98-004-3249).

## Stability measurement protocol

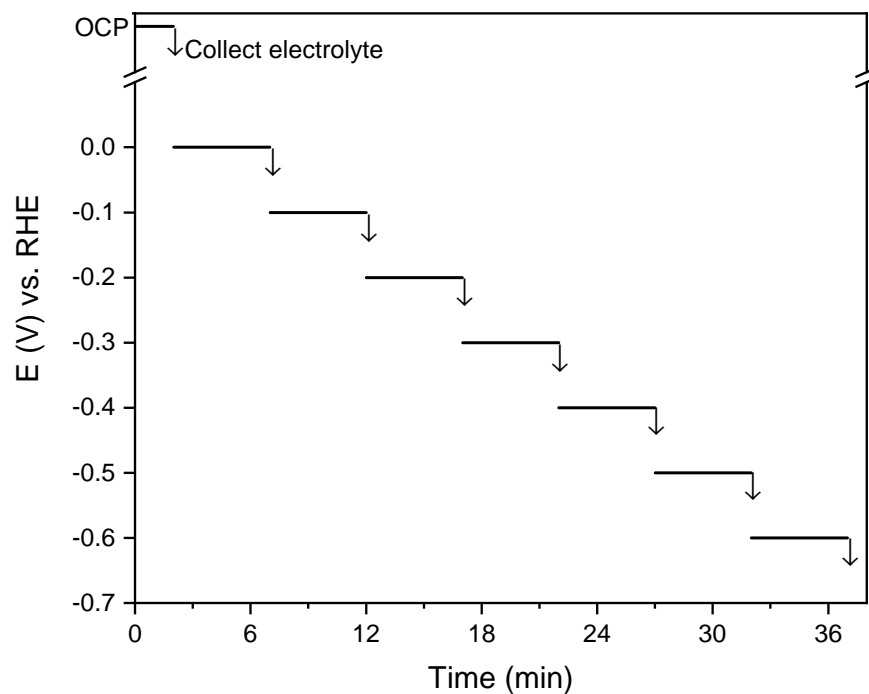

Figure S9: Electrochemical stability measurement protocol of non-precious HER catalysts. The total volume of the electrolyte was 30 mL 0.5 M  $\text{H}_2\text{SO}_4$ . During the measurements, 1 mL of the electrolyte was collected after each potential holding for further ICP-MS analysis.

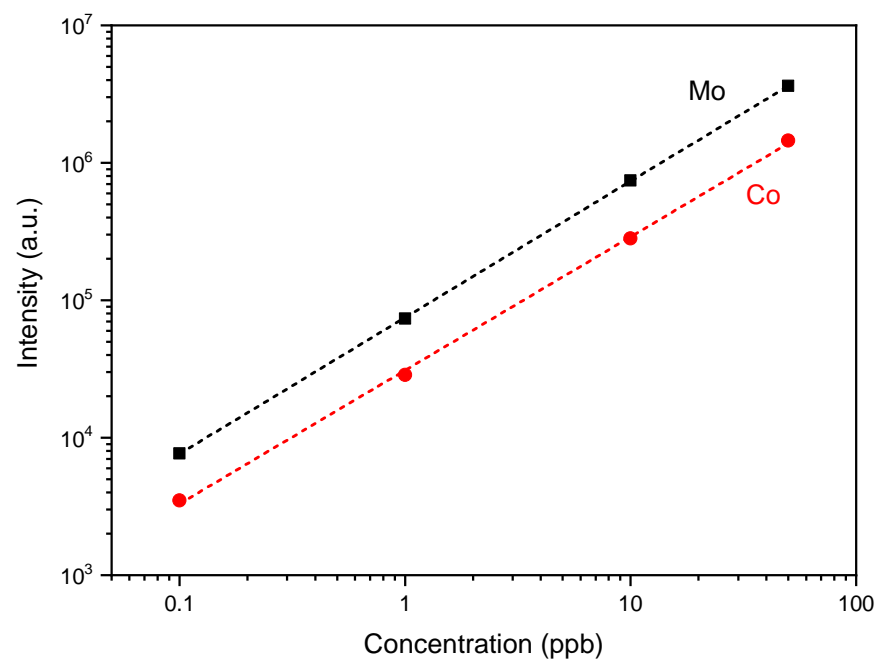

Figure S10: Representative calibration curves for Mo and Co quantification using ICP-MS.



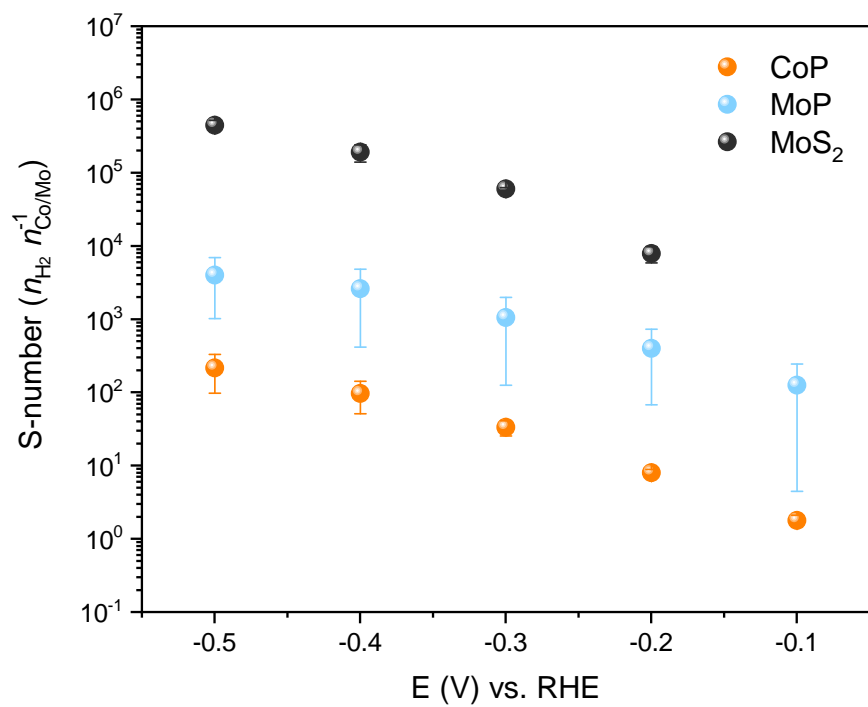

Figure S11: Calculated S-numbers of CoP, MoP, and MoS<sub>2</sub> at different working potentials in 0.5 M H<sub>2</sub>SO<sub>4</sub>.

# Raw data of calculated and experimental formation enthalpies for 83 sulfides and 28 phosphides

Table S1: Calculated and experimental formation enthalpies (eV/atom) of 83 sulfides.  $\Delta H_{\text{SCAN}}$  and  $\Delta H_{\text{PBE}}$  are calculated data using the SCAN and PBE functional, respectively.  $\Delta H_{\text{MP-PBE}}$  represents PBE calculated data with a sulfur correction of 0.66 eV/S.<sup>20</sup> Both PBE and MP-PBE data were retrieved from the MP.<sup>5,16</sup> The experimental data were obtained from Ref 17,18.

| Materials                      | $\Delta H_{\text{exp}}$ | $\Delta H_{\text{SCAN}}$ | $\Delta H_{\text{MP-PBE}}$ | $\Delta H_{\text{PBE}}$ | Compound                       | $\Delta H_{\text{exp}}$ | $\Delta H_{\text{SCAN}}$ | $\Delta H_{\text{MP-PBE}}$ | $\Delta H_{\text{PBE}}$ |
|--------------------------------|-------------------------|--------------------------|----------------------------|-------------------------|--------------------------------|-------------------------|--------------------------|----------------------------|-------------------------|
| Ag <sub>2</sub> S              | -0.11                   | -0.08                    | -0.276                     | -0.055                  | MoS <sub>2</sub>               | -0.954                  | -0.928                   | -1.309                     | -0.866                  |
| Al <sub>2</sub> S <sub>3</sub> | -1.5                    | -1.259                   | -1.455                     | -1.057                  | Na <sub>2</sub> S              | -1.265                  | -1.259                   | -1.292                     | -1.07                   |
| As <sub>2</sub> S <sub>3</sub> | -0.347                  | -0.173                   | -0.526                     | -0.128                  | NaS                            | -1.029                  | -0.992                   | -1.164                     | -0.832                  |
| AsS                            | -0.368                  | -0.167                   | -0.466                     | -0.134                  | Nd <sub>2</sub> S <sub>3</sub> | -2.333                  | -2.367                   | -2.457                     | -2.059                  |
| B <sub>2</sub> S <sub>3</sub>  | -0.523                  | -0.538                   | -0.832                     | -0.434                  | NdS                            | -2.409                  | -2.275                   | -2.356                     | -2.024                  |
| BaS                            | -2.402                  | -2.367                   | -2.41                      | -2.079                  | Ni <sub>3</sub> S <sub>2</sub> | -0.448                  | -0.401                   | -0.636                     | -0.371                  |
| BeS                            | -1.214                  | -1.252                   | -1.388                     | -1.057                  | Ni <sub>3</sub> S <sub>4</sub> | -0.446                  | -0.474                   | -0.751                     | -0.372                  |
| Bi <sub>2</sub> S <sub>3</sub> | -0.297                  | -0.297                   | -0.742                     | -0.344                  | NiS                            | -0.456                  | -0.43                    | -0.69                      | -0.359                  |
| CS <sub>2</sub>                | 0.308                   | 0.285                    | -0.172                     | 0.27                    | OsS <sub>2</sub>               | -0.508                  | -0.438                   | -0.799                     | -0.357                  |
| CaS                            | -2.452                  | -2.434                   | -2.483                     | -2.151                  | P <sub>2</sub> S <sub>3</sub>  | -0.251                  | -0.202                   | -0.561                     | -0.163                  |
| CdS                            | -0.774                  | -0.758                   | -0.972                     | -0.641                  | P <sub>4</sub> S <sub>3</sub>  | -0.333                  | -0.151                   | -0.431                     | -0.146                  |
| Ce <sub>2</sub> S <sub>3</sub> | -2.463                  | -2.352                   | -2.425                     | -2.027                  | PbS                            | -0.51                   | -0.553                   | -0.865                     | -0.533                  |
| Ce <sub>3</sub> S <sub>4</sub> | -2.447                  | -2.302                   | -2.403                     | -2.024                  | Pd <sub>4</sub> S              | -0.143                  | -0.197                   | -0.313                     | -0.18                   |
| CeS                            | -2.366                  | -2.216                   | -2.378                     | -2.046                  | PdS                            | -0.366                  | -0.479                   | -0.686                     | -0.354                  |
| Co <sub>3</sub> S <sub>4</sub> | -0.532                  | -0.555                   | -0.817                     | -0.438                  | PdS <sub>2</sub>               | -0.27                   | -0.357                   | -0.713                     | -0.271                  |
| CoS                            | -0.43                   | -0.423                   | -0.742                     | -0.41                   | PrS                            | -2.342                  | -2.278                   | -2.347                     | -2.016                  |
| CoS <sub>2</sub>               | -0.529                  | -0.496                   | -0.774                     | -0.331                  | PtS                            | -0.431                  | -0.568                   | -0.737                     | -0.406                  |
| CrS                            | -0.819                  | -0.849                   | -0.581                     | -0.25                   | PtS <sub>2</sub>               | -0.383                  | -0.522                   | -0.792                     | -0.349                  |
| Cs <sub>2</sub> S              | -1.198                  | -1.243                   | -1.18                      | -0.959                  | Rb <sub>2</sub> S              | -1.248                  | -1.187                   | -1.215                     | -0.993                  |
| Cu <sub>2</sub> S              | -0.275                  | -0.169                   | -0.346                     | -0.125                  | ReS <sub>2</sub>               | -0.617                  | -0.581                   | -1.011                     | -0.569                  |

*Continued on next page*

Table S1 – *Continued from previous page*

| Materials                      | $\Delta H_{\text{exp}}$ | $\Delta H_{\text{SCAN}}$ | $\Delta H_{\text{MP-PBE}}$ | $\Delta H_{\text{PBE}}$ | Compound                       | $\Delta H_{\text{exp}}$ | $\Delta H_{\text{SCAN}}$ | $\Delta H_{\text{MP-PBE}}$ | $\Delta H_{\text{PBE}}$ |
|--------------------------------|-------------------------|--------------------------|----------------------------|-------------------------|--------------------------------|-------------------------|--------------------------|----------------------------|-------------------------|
| CuS                            | -0.271                  | -0.257                   | -0.525                     | -0.194                  | Rh <sub>2</sub> S <sub>3</sub> | -0.545                  | -0.633                   | -0.869                     | -0.471                  |
| EuS                            | -2.342                  | -2.423                   | -2.47                      | -2.138                  | Rh <sub>3</sub> S <sub>4</sub> | -0.53                   | -0.619                   | -0.863                     | -0.484                  |
| FeS                            | -0.527                  | -0.474                   | -0.839                     | -0.507                  | RuS <sub>2</sub>               | -0.711                  | -0.678                   | -0.992                     | -0.55                   |
| FeS <sub>2</sub>               | -0.593                  | -0.594                   | -0.955                     | -0.513                  | SO <sub>3</sub>                | -1.136                  | -1.214                   | -1.755                     | -1.062                  |
| Ga <sub>2</sub> S <sub>3</sub> | -1.07                   | -0.75                    | -1.06                      | -0.662                  | Sb <sub>2</sub> S <sub>3</sub> | -0.425                  | -0.255                   | -0.647                     | -0.249                  |
| GaS                            | -1.084                  | -0.711                   | -0.983                     | -0.652                  | SiS <sub>2</sub>               | -0.737                  | -0.753                   | -1.119                     | -0.677                  |
| GeS                            | -0.394                  | -0.251                   | -0.585                     | -0.253                  | SmS                            | -2.234                  | -2.252                   | -2.355                     | -2.023                  |
| GeS <sub>2</sub>               | -0.542                  | -0.366                   | -0.769                     | -0.327                  | Sn <sub>2</sub> S <sub>3</sub> | -0.546                  | -0.431                   | -0.801                     | -0.403                  |
| HgS                            | -0.276                  | -0.176                   | -0.459                     | -0.128                  | SnS                            | -0.559                  | -0.444                   | -0.778                     | -0.446                  |
| In <sub>2</sub> S <sub>3</sub> | -0.737                  | -0.706                   | -0.931                     | -0.533                  | SnS <sub>2</sub>               | -0.531                  | -0.424                   | -0.823                     | -0.381                  |
| InS                            | -0.694                  | -0.66                    | -0.823                     | -0.491                  | SrS                            | -2.45                   | -2.439                   | -2.475                     | -2.144                  |
| Ir <sub>2</sub> S <sub>3</sub> | -0.517                  | -0.452                   | -0.764                     | -0.366                  | TaS <sub>2</sub>               | -1.223                  | -1.127                   | -1.491                     | -1.048                  |
| IrS <sub>2</sub>               | -0.46                   | -0.485                   | -0.843                     | -0.401                  | Th <sub>2</sub> S <sub>3</sub> | -2.245                  | -2.157                   | -2.353                     | -1.954                  |
| K <sub>2</sub> S               | -1.301                  | -1.247                   | -1.276                     | -1.055                  | ThS                            | -2.071                  | -1.962                   | -2.168                     | -1.837                  |
| KS                             | -1.12                   | -1.097                   | -1.264                     | -0.932                  | ThS <sub>2</sub>               | -2.168                  | -2.241                   | -2.427                     | -1.985                  |
| La <sub>2</sub> S <sub>3</sub> | -2.454                  | -2.504                   | -2.591                     | -2.192                  | TiS                            | -1.41                   | -1.627                   | -1.8                       | -1.468                  |
| LaS                            | -2.448                  | -2.412                   | -2.495                     | -2.163                  | TiS <sub>2</sub>               | -1.406                  | -1.475                   | -1.715                     | -1.273                  |
| Li <sub>2</sub> S              | -1.544                  | -1.542                   | -1.557                     | -1.336                  | Tl <sub>2</sub> S              | -0.328                  | -0.443                   | -0.565                     | -0.344                  |
| MgS                            | -1.792                  | -1.667                   | -1.759                     | -1.428                  | WS <sub>2</sub>                | -0.896                  | -0.825                   | -1.261                     | -0.819                  |
| MnS                            | -1.11                   | -1.03                    | -0.883                     | -0.551                  | ZnS                            | -1.063                  | -0.933                   | -1.144                     | -0.812                  |
| MnS <sub>2</sub>               | -0.715                  | -0.801                   | -0.997                     | -0.554                  | ZrS <sub>2</sub>               | -1.995                  | -1.771                   | -1.956                     | -1.514                  |
| Mo <sub>2</sub> S <sub>3</sub> | -0.844                  | -0.761                   | -1.082                     | -0.684                  |                                |                         |                          |                            |                         |

Table S2: Calculated and experimental formation enthalpies (eV/atom) of 28 phosphides.  $\Delta H_{\text{SCAN}}$  and  $\Delta H_{\text{PBE}}$  are calculated data using the SCAN and PBE functional, respectively. PBE data were retrieved from the MP.<sup>5,16</sup> The experimental data were obtained from Ref 17,19

| Materials                      | $\Delta H_{\text{exp}}$ | $\Delta H_{\text{SCAN}}$ | $\Delta H_{\text{PBE}}$ | Compound                       | $\Delta H_{\text{exp}}$ | $\Delta H_{\text{SCAN}}$ | $\Delta H_{\text{PBE}}$ |
|--------------------------------|-------------------------|--------------------------|-------------------------|--------------------------------|-------------------------|--------------------------|-------------------------|
| AgP <sub>2</sub>               | -0.15                   | -0.028                   | -0.006                  | GeP                            | -0.109                  | 0.015                    | 0.015                   |
| AlP                            | -0.852                  | -0.755                   | -0.609                  | InP                            | -0.39                   | -0.322                   | -0.206                  |
| Au <sub>2</sub> P <sub>3</sub> | -0.202                  | -0.18                    | -0.11                   | Mn <sub>2</sub> P              | -0.591                  | -0.587                   | -0.514                  |
| BP                             | -0.598                  | -0.498                   | -0.407                  | MnP                            | -0.585                  | -0.605                   | -0.556                  |
| Co <sub>2</sub> P              | -0.648                  | -0.426                   | -0.523                  | Ni <sub>2</sub> P              | -0.568                  | -0.468                   | -0.478                  |
| CoP                            | -0.65                   | -0.508                   | -0.584                  | Ni <sub>3</sub> P              | -0.519                  | -0.411                   | -0.441                  |
| CoP <sub>3</sub>               | -0.53                   | -0.51                    | -0.497                  | NiP <sub>2</sub>               | -0.447                  | -0.419                   | -0.372                  |
| Cu <sub>3</sub> P              | -0.334                  | -0.027                   | -0.02                   | NiP <sub>3</sub>               | -0.409                  | -0.322                   | -0.303                  |
| CuP <sub>2</sub>               | -0.311                  | -0.149                   | -0.112                  | P <sub>2</sub> Os              | -0.526                  | -0.589                   | -0.521                  |
| Fe <sub>2</sub> P              | -0.554                  | -0.388                   | -0.458                  | SiP                            | -0.321                  | -0.127                   | -0.136                  |
| Fe <sub>3</sub> P              | -0.425                  | -0.316                   | -0.206                  | Th <sub>3</sub> P <sub>4</sub> | -1.691                  | -1.544                   | -1.431                  |
| FeP                            | -0.715                  | -0.488                   | -0.585                  | ThP                            | -1.804                  | -1.642                   | -1.553                  |
| FeP <sub>2</sub>               | -0.763                  | -0.487                   | -0.537                  | Zn <sub>3</sub> P <sub>2</sub> | -0.33                   | -0.211                   | -0.188                  |
| GaP                            | -0.52                   | -0.446                   | -0.409                  | ZnP <sub>2</sub>               | -0.351                  | -0.295                   | -0.249                  |

Table S3: Calculated and experimental formation Gibbs free energies (eV/formula) of solids and aqueous ions for SCAN-calculated Pourbaix diagrams. The referenced solids of each Pourbaix diagram are highlighted in bold. The experimental data were obtained from Ref 15,21.

| Species                                           | $\Delta G_{\text{exp}}$ | $\Delta G_{\text{calc}}$ | Species                                           | $\Delta G_{\text{exp}}$ | $\Delta G_{\text{calc}}$ |
|---------------------------------------------------|-------------------------|--------------------------|---------------------------------------------------|-------------------------|--------------------------|
| Mo                                                | -                       | 0                        | H <sub>2</sub> PO <sub>4</sub> [-]                | -11.715                 | -                        |
| Mo <sub>9</sub> O <sub>26</sub>                   | -                       | -59.749                  | H <sub>3</sub> P <sub>2</sub> O <sub>7</sub> [-]  | -20.971                 | -                        |
| MoH                                               | -                       | 1.304                    | H <sub>3</sub> PO <sub>4</sub> (aq)               | -11.842                 | -                        |
| <b>MoO<sub>2</sub></b>                            | -5.524                  | -5.456                   | H <sub>4</sub> P <sub>2</sub> O <sub>7</sub> (aq) | -21.061                 | -                        |
| MoO <sub>3</sub>                                  | -                       | -6.779                   | HP <sub>2</sub> O <sub>7</sub> [3-]               | -20.441                 | -                        |
| MoO <sub>4</sub> [2-]                             | -8.667                  | -8.599                   | HPO <sub>3</sub> [2-]                             | -8.412                  | -                        |
| MoO <sub>5</sub>                                  | -                       | -3.920                   | HPO <sub>4</sub> [2-]                             | -11.289                 | -                        |
| MoS <sub>2</sub>                                  | -                       | -2.784                   | P(HO <sub>2</sub> ) <sub>2</sub> [-]              | -                       | -11.608                  |
| Mo[3+]                                            | -0.593                  | -0.525                   | <b>P<sub>2</sub>O<sub>5</sub></b>                 | -14.114                 | -13.900                  |
| <b>Na<sub>2</sub>SO<sub>4</sub></b>               | -13.253                 | -13.085                  | P <sub>2</sub> O <sub>7</sub> [4-]                | -19.893                 | -                        |
| H <sub>2</sub> S(aq)                              | -0.285                  | -0.117                   | P <sub>2</sub> O <sub>9</sub>                     | -                       | -8.603                   |
| H <sub>2</sub> S <sub>2</sub> O <sub>3</sub> (aq) | -5.551                  | -                        | PH <sub>2</sub> O <sub>3</sub> [-]                | -                       | -8.668                   |
| H <sub>2</sub> S <sub>2</sub> O <sub>4</sub> (aq) | -6.393                  | -                        | PH <sub>3</sub>                                   | -                       | 1.091                    |
| H <sub>2</sub> S <sub>2</sub> O <sub>7</sub>      | -                       | -10.017                  | PH <sub>3</sub> (aq)                              | 0.263                   | 0.370                    |
| H <sub>2</sub> SO <sub>4</sub> (aq)               | -7.718                  | -7.550                   | PH <sub>3</sub> O <sub>4</sub> (aq)               | -                       | -11.735                  |
| H <sub>2</sub> SO <sub>5</sub>                    | -                       | -5.876                   | PH <sub>4</sub> [+]                               | 0.954                   | 1.061                    |
| H <sub>3</sub> S                                  | -                       | 0.107                    | PHO <sub>3</sub> [2-]                             | -                       | -8.305                   |
| HS <sub>2</sub> O <sub>3</sub> [-]                | -5.516                  | -                        | PHO <sub>4</sub> [2-]                             | -                       | -11.182                  |
| HS <sub>2</sub> O <sub>4</sub> [-]                | -6.371                  | -                        | PO <sub>4</sub> [3-]                              | -10.555                 | -10.447                  |
| HSO <sub>3</sub> [-]                              | -5.469                  | -                        | Co                                                | -                       | 0                        |
| HSO <sub>4</sub> [-]                              | -7.836                  | -7.667                   | Co(HO) <sub>2</sub>                               | -                       | -5.020                   |
| HSO <sub>5</sub> [-]                              | -6.607                  | -6.439                   | Co <sub>2</sub> P                                 | -                       | -1.277                   |

*Continued on next page*

Table S3 – *Continued from previous page*

| Species                            | $\Delta G_{\text{exp}}$ | $\Delta G_{\text{calc}}$ | Species                                           | $\Delta G_{\text{exp}}$ | $\Delta G_{\text{calc}}$ |
|------------------------------------|-------------------------|--------------------------|---------------------------------------------------|-------------------------|--------------------------|
| HS[-]                              | 0.126                   | 0.294                    | Co <sub>3</sub> O <sub>4</sub>                    | -                       | -8.858                   |
| S                                  | -                       | 0                        | Co <sub>3</sub> P <sub>2</sub> (HO) <sub>16</sub> | -                       | -45.586                  |
| S <sub>2</sub> O <sub>3</sub> [2-] | -5.371                  | -                        | CoH                                               | -                       | 0.379                    |
| S <sub>2</sub> O <sub>4</sub> [2-] | -6.219                  | -                        | CoH <sub>3</sub>                                  | -                       | 1.875                    |
| S <sub>2</sub> O <sub>5</sub> [2-] | -8.192                  | -                        | CoHO <sub>2</sub>                                 | -                       | -4.277                   |
| S <sub>2</sub> O <sub>6</sub> [2-] | -10.014                 | -                        | CoHO <sub>2</sub> [-]                             | -                       | -3.855                   |
| S <sub>2</sub> O <sub>8</sub> [2-] | -11.506                 | -                        | <b>CoO</b>                                        | -2.125                  | -2.382                   |
| S <sub>2</sub> [2-]                | 0.829                   | -                        | CoO <sub>2</sub>                                  | -                       | -2.008                   |
| S <sub>3</sub> O <sub>6</sub> [2-] | -9.927                  | -                        | CoO <sub>4</sub>                                  | -                       | 3.433                    |
| S <sub>3</sub> [2-]                | 0.767                   | -                        | CoP                                               | -                       | -1.016                   |
| S <sub>4</sub> O <sub>6</sub> [2-] | -10.588                 | -                        | Co[2+]                                            | -0.555                  | -0.812                   |
| S <sub>4</sub> [2-]                | 0.720                   | -                        | Co[3+]                                            | 1.253                   | 0.996                    |
| S <sub>5</sub> O <sub>6</sub> [2-] | -9.901                  | -                        | HCoO <sub>2</sub> [-]                             | -3.598                  | -                        |
| S <sub>5</sub> [2-]                | 0.690                   | -                        | Ni                                                | -                       | 0                        |
| SO <sub>2</sub> (aq)               | -3.114                  | -                        | Ni(HO) <sub>2</sub>                               | -4.696                  | -4.848                   |
| SO <sub>3</sub> [2-]               | -4.949                  | -4.780                   | Ni(HO) <sub>3</sub> [-]                           | -                       | -6.231                   |
| SO <sub>4</sub>                    | -                       | -2.217                   | Ni(HO) <sub>4</sub> [2-]                          | -                       | -7.860                   |
| SO <sub>4</sub> [2-]               | -7.714                  | -7.545                   | <b>Ni(OH)<sub>2</sub></b>                         | -4.696                  | -4.848                   |
| S[2-]                              | 0.894                   | 1.063                    | Ni(OH) <sub>2</sub> (aq)                          | -4.208                  | -                        |
| H <sub>3</sub> Pt                  | -                       | 2.595                    | Ni(OH) <sub>3</sub> [-]                           | -6.079                  | -                        |
| H <sub>4</sub> Pt                  | -                       | 2.101                    | Ni(OH) <sub>4</sub> [2-]                          | -7.709                  | -                        |
| H <sub>8</sub> PtO <sub>6</sub>    | -                       | -6.507                   | Ni <sub>2</sub> O <sub>5</sub>                    | -                       | -1.580                   |
| HPt <sub>3</sub>                   | -                       | 2.185                    | Ni <sub>3</sub> Mo                                | -                       | -0.166                   |
| <b>Pt</b>                          | 0                       | 0                        | NiH                                               | -                       | 0.195                    |

*Continued on next page*

Table S3 – *Continued from previous page*

| Species                                           | $\Delta G_{\text{exp}}$ | $\Delta G_{\text{calc}}$ | Species               | $\Delta G_{\text{exp}}$ | $\Delta G_{\text{calc}}$ |
|---------------------------------------------------|-------------------------|--------------------------|-----------------------|-------------------------|--------------------------|
| Pt <sub>2</sub> O                                 | -                       | 0.631                    | NiH <sub>3</sub>      | -                       | 1.534                    |
| Pt <sub>3</sub> O <sub>4</sub>                    | -                       | -3.626                   | NiHO <sub>2</sub>     | -                       | -3.393                   |
| PtO                                               | -                       | -0.532                   | NiO(aq)               | -1.706                  | -                        |
| PtO <sub>2</sub>                                  | -                       | -1.651                   | NiO <sub>2</sub>      | -                       | -1.513                   |
| PtO <sub>3</sub>                                  | -                       | -0.249                   | NiO <sub>2</sub> [2-] | -2.784                  | -2.935                   |
| PtO <sub>6</sub>                                  | -                       | 1.279                    | NiO <sub>3</sub>      | -                       | 2.158                    |
| Pt[2+]                                            | 1.925                   | 1.925                    | NiOH[+]               | -2.355                  | -                        |
| H <sub>2</sub> P <sub>2</sub> O <sub>7</sub> [2-] | -20.842                 | -                        | Ni[2+]                | -0.480                  | -0.631                   |
| H <sub>2</sub> PO <sub>3</sub> [-]                | -8.775                  | -                        | -                     | -                       | -                        |

## References

- (1) Kresse, G.; Furthmüller, J. Efficient iterative schemes for *ab initio* total-energy calculations using a plane-wave basis set. *Physical Review B* **1996**, *54*, 11169–11186.
- (2) Blöchl, P. E. Projector augmented-wave method. *Physical Review B* **1994**, *50*, 17953–17979.
- (3) Sun, J.; Ruzsinszky, A.; Perdew, J. Strongly Constrained and Appropriately Normed Semilocal Density Functional. *Physical Review Letters* **2015**, *115*, 036402.
- (4) Jain, A.; Ong, S. P.; Hautier, G.; Chen, W.; Richards, W. D.; Dacek, S.; Cholia, S.; Gunter, D.; Skinner, D.; Ceder, G.; Persson, K. A. Commentary: The materials project: A materials genome approach to accelerating materials innovation. *APL Materials* **2013**, *1*, 011002.
- (5) Ong, S. P.; Richards, W. D.; Jain, A.; Hautier, G.; Kocher, M.; Cholia, S.; Gunter, D.; Chevrier, V. L.; Persson, K. A.; Ceder, G. Python Materials Genomics (pymatgen): A robust, open-source python library for materials analysis. *Computational Materials Science* **2013**, *68*, 314–319.
- (6) Persson, K. A.; Waldwick, B.; Lazic, P.; Ceder, G. Prediction of solid-aqueous equilibria: Scheme to combine first-principles calculations of solids with experimental aqueous states. *Physical Review B* **2012**, *85*, 235438.
- (7) Singh, A. K.; Zhou, L.; Shinde, A.; Suram, S. K.; Montoya, J. H.; Winston, D.; Gregoire, J. M.; Persson, K. A. Electrochemical Stability of Metastable Materials. *Chemistry of Materials* **2017**, *29*, 10159–10167.
- (8) Patel, A. M.; Nørskov, J. K.; Persson, K. A.; Montoya, J. H. Efficient Pourbaix diagrams of many-element compounds. *Physical Chemistry Chemical Physics* **2019**, *21*, 25323–25327.
- (9) Wang, Z.; Guo, X.; Montoya, J.; Nørskov, J. K. Predicting aqueous stability of solid with computed Pourbaix diagram using SCAN functional. *npj Computational Materials* **2020**, *6*, 160.



- (10) Bertheussen, E.; Hogg, T. V.; Abghoui, Y.; Engstfeld, A. K.; Chorkendorff, I.; Stephens, I. E. L. Electroreduction of CO on Polycrystalline Copper at Low Overpotentials. *ACS Energy Letters* **2018**, *3*, 634–640.
- (11) Hinnemann, B.; Moses, P. G.; Bonde, J.; Jørgensen, K. P.; Nielsen, J. H.; Horch, S.; Chorkendorff, I.; Nørskov, J. K. Biomimetic Hydrogen Evolution: MoS<sub>2</sub> Nanoparticles as Catalyst for Hydrogen Evolution. *Journal of the American Chemical Society* **2005**, *127*, 5308–5309.
- (12) Jaramillo, T. F.; Jørgensen, K. P.; Bonde, J.; Nielsen, J. H.; Horch, S.; Chorkendorff, I. Identification of active edge sites for electrochemical H<sub>2</sub> evolution from MoS<sub>2</sub> nanocatalysts. *Science* **2007**, *317*, 100–102.
- (13) Chen, Z.; Cummins, D.; Reinecke, B. N.; Clark, E.; Sunkara, M. K.; Jaramillo, T. F. Core–shell MoO<sub>3</sub>–MoS<sub>2</sub> Nanowires for Hydrogen Evolution: A Functional Design for Electrocatalytic Materials. *Nano Letters* **2011**, *11*, 4168–4175.
- (14) Ledendecker, M.; Mondschein, J. S.; Kasian, O.; Geiger, S.; Göhl, D.; Schalenbach, M.; Zeradjanin, A.; Cherevko, S.; Schaak, R. E.; Mayrhofer, K. Stability and Activity of Non-Noble-Metal-Based Catalysts Toward the Hydrogen Evolution Reaction. *Angewandte Chemie - International Edition* **2017**, *56*, 9767–9771.
- (15) Pourbaix, M. *Atlas of Electrochemical Equilibria in Aqueous Solutions.*, 2nd ed.; National Association of Corrosion Engineers: Houston, TX, 1974.
- (16) Ong, S. P.; Cholia, S.; Jain, A.; Brafman, M.; Gunter, D.; Ceder, G.; Persson, K. A. The Materials Application Programming Interface (API): A simple, flexible and efficient API for materials data based on REpresentational State Transfer (REST) principles. *Computational Materials Science* **2015**, *97*, 209–215.
- (17) O. Kubaschewski; C. B. Alcock; P. J. Spencer, *Materials thermochemistry*, 6th ed.; Pergamon Press, Oxford, NY, 1993.

- (18) Linstrom, P.J.; Mallard, W.G., *Eds.*, *NIST Chemistry WebBook, NIST Standard Reference Database Number 69*; National Institute of Standards and Technology, Gaithersburg MD, 20899, <https://doi.org/10.18434/T4D303>, 2020.
- (19) Barin, I. *Thermochemical Data of Pure Substances*, 3rd ed.; Wiley, New York, USA, 1995.
- (20) Zhu, Z.; Chu, I.-H.; Deng, Z.; Ong, S. P. Role of  $\text{Na}^+$  Interstitials and Dopants in Enhancing the  $\text{Na}^+$  Conductivity of the Cubic  $\text{Na}_3\text{PS}_4$  Superionic Conductor. *Chemistry of Materials* **2015**, 27, 8318–8325.
- (21) Wagman, D. D.; Evans, W. H.; Halow, I.; Parker, V. B.; Bailey, S. M.; Schumm, R. H.; (U.S.), I. f. B. S.; of Standards, U. S. N. B.; of Commerce, U. S. D. *Selected Values of Chemical Thermodynamic Properties*; NBS technical note; United States Department of Commerce, National Bureau of Standards, Washington, D.C., 1966.
